# Supplementary material
Source: Springer Nature journal article supplement (https://www.springermedizin.de/resource/supplementary/13033_2012_136_MOESM2_ESM.pdf/9651882)

a

### Comparisons of improvement of the three scales

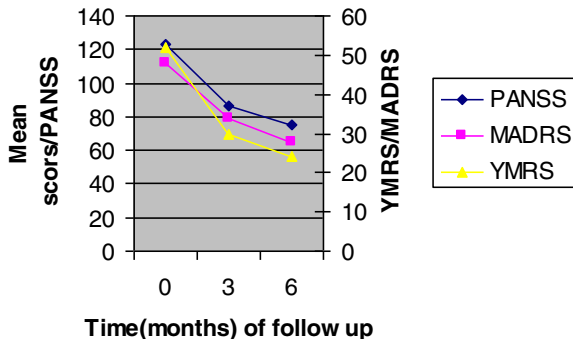

b

### Comparisons of negative, positive and general psychopathology mean scores

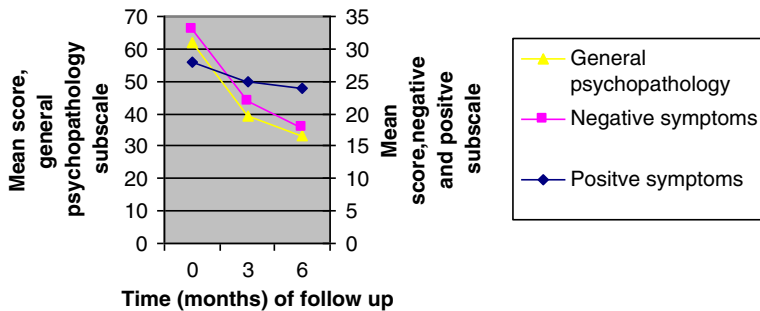

Supplement: MOESM2 [file 9651882]
